# Supplementary material
Source: Springer Nature journal article supplement (https://www.springermedizin.de/resource/supplementary/13063_2012_1015_MOESM1_ESM.pdf/9619694)
Supplement: MOESM1 [file 9619694]

Inclusion criteria for staff met.  
Screened & consent obtained

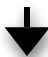

Baseline Assessment (0/12 months) & socio-demographic information

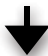

Cluster randomisation

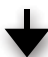

Intervention  
CST training day, CST manual, Maintenance CST manuals & DVD

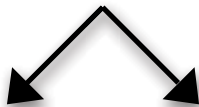

Outreach support

No outreach support

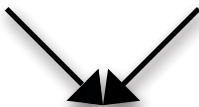

1<sup>st</sup> follow up assessment (6/12 months)

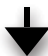

2<sup>nd</sup> follow up assessment (12/12 months)
